# Supplementary material for: Mitochondrial DNA depletion sensitizes cancer cells to PARP inhibitors by translational and post-translational repression of BRCA2
Source: PubMed Central journal article supplement — Oncogenesis. 2013 Dec 16;2(12):e82–. doi: 10.1038/oncsis.2013.45 (PMC3940862; doi:10.1038/oncsis.2013.45), 2013-12-16
Supplement: oncsis201345x4.pdf [file oncsis201345x4.pdf]

## Supplementary Information

### Supplementary Materials and Methods

#### $\gamma$ H2AX/Rad51 immunofluorescence

Cells were seeded on coverslips in six-well plates and incubated in 2 mL medium containing 10  $\mu$ mol/L AG014699 (Selleckchem Houston, TX, USA) for 24 h. Coverslips were washed twice with ice-cold PBS, fixed with ice-cold methanol at  $-20^{\circ}\text{C}$  for 10 min, rehydrated with two changes of PBS for 20 min, permeabilized with blocking buffer (KCM buffer: 120 mM KCl, 20 mM NaCl, 10 mM Tris-HCl, 1 mM EDTA plus 0.1% Triton X-100, 2% bovine serum albumin, 10% milk powder, and 10% normal goat serum) and incubated with primary anti-phospho-histone H2AX (Ser<sup>139</sup>) antibody (clone JBW301, mouse monoclonal antibody; Upstate, Millipore Corp.) diluted in blocking buffer (1:200) for 2 h at room temperature. After washing the coverslips, primary antibody for Rad51 (anti-Rad51 rabbit polyclonal antibody; Calbiochem, EMD Biosciences, Inc.) was added and incubated for 2 h at room temperature before overnight incubation at  $4^{\circ}\text{C}$ . Secondary anti-mouse and anti-rabbit antibodies (Alexa Fluor 546 goat anti-mouse IgG, diluted 1:200; Alexa Fluor 488 goat anti-rabbit IgG, diluted 1:100; Life Technologies) were added to the coverslips and incubated at room temperature for 1 h in the dark. Coverslips were mounted on slides using ProLong® Gold Antifade Reagent with DAPI (Promega) and analyzed using a laser scanning microscope (Axioskop 2 plus, Carl Zeiss Co., Ltd).  $\gamma$ H2AX and Rad51 foci were quantified in 30 nuclei from three different fields of each coverslip. The average number of  $\gamma$ H2AX and Rad51 foci per cell was expressed as percentage of untreated controls.

**PARP activity**

PARP activity in cell extracts before and 24 h after addition of 10  $\mu\text{mol/L}$  AG014699 was measured by a colorimetric assay according to the manufacturer's instructions (PARP Universal Colorimetric Assay Kit, R&D Systems).

## Supplementary Figure legends

**Supplementary Figure S1.** PARP activity was measured in wild-type and Rho(0) cells 24 h after treatment with rucaparib and expressed as percentage of untreated cells.

**Supplementary Figure S2.** Total ATP levels were measured in wild-type, cybrids and Rho(0) cells using a luciferin/luciferase-based kit.

**Supplementary Figure S3.** (a) Total DNA extracted from normal prostate (N; n=6), BPH (n=2) and prostate carcinoma (PCa; n=1) specimens was subjected to long-PCR analysis of the complete mtDNA. M= *molecular weight marker*. (b) For the 9 PCa patients presented in Figure 7a, mtDNA from peripheral blood lymphocytes obtained at the time of surgery was analyzed concomitantly (*top panel*). Amplification of  $\beta$ -globin was used as quality and quantity control of the total DNA (*bottom panel*).
